# Supplementary material for: Quantifying Aboveground Grass Biomass Using Space-Borne Sensors: A Meta-Analysis and Systematic Review
Source: MDPI journal article supplement (doi:10.3390/geomatics3040026), 2023-10-18
Supplement: s1 [file s1]

## Supplementary Materials

A full list of the 108 articles extracted from the four databases, including the author's name, the journal's name, and the year.

**Table S1.** The 108 articles extracted from WoS, IEEE, Scopus and Google scholar.

| Authors                                                                                         | Journal Name                                                                     | Year |
|-------------------------------------------------------------------------------------------------|----------------------------------------------------------------------------------|------|
| Ali, I; Barrett, B; Cawkwell, F; Green, S; Dwyer, E; Neumann, M                                 | IEEE Journal of Selected Topics in Applied Earth Observations and Remote Sensing | 2017 |
| Ali, I; Cawkwell, F; Dwyer, E; Green, S                                                         | IEEE Journal of Selected Topics in Applied Earth Observations and Remote Sensing | 2016 |
| An, N; Price, KP; Blair, JM                                                                     | International Journal of Remote Sensing                                          | 2013 |
| Bao, N; Li, W; Gu, X; Liu, Y                                                                    | Remote Sensing                                                                   | 2019 |
| Barrachina, M; Cristobal, J; Tulla, AF                                                          | International Journal of Applied Earth Observation and Geoinformation            | 2015 |
| Braun, A; Wagner, J; Hochschild, V                                                              | Journal of Applied Remote Sensing                                                | 2018 |
| Butterfield, HS; Malmstrom, CM                                                                  | International Journal of Remote Sensing                                          | 2009 |
| Chen, J; Gu, S; Shen, M; Tang, Y; Matsushita, B                                                 | International Journal of Remote Sensing                                          | 2009 |
| Cho, MA; Skidmore, AK                                                                           | International Journal of Remote Sensing                                          | 2013 |
| Cicore, P; Serrano, J; Shahidian, S; Sousa A; Costa, JL; Da Silva, JRM                          | Environmental Monitoring and Assessment                                          | 2016 |
| Cisneros, A; Fiorio, P; Menezes, P; Pasqualotto, N; Van Wittenberghe, S; Bayma, G; Nogueira, SF | Agronomy-Basel                                                                   | 2020 |
| Clevers, JGPW; Van der Heijden, GWAM; Verzakov, S; Schaepman, ME                                | Photogrammetric Engineering & Remote Sensing                                     | 2007 |
| Cooper, SD; Roy, DP; Schaaf, CB; Paynter, I                                                     | Remote Sensing                                                                   | 2017 |
| Ding, L; Li, Z; Wang, X; Yan, R; Shen, B; Chen, B; Xin, X                                       | Sensors                                                                          | 2019 |
| Diouf AA; Hiernaux P; Brandt M; Faye G; Djaby, B; Diop MB; Ndione JA; Tychon B                  | Remote Sensing                                                                   | 2016 |
| Duan, M; Gao, Q; Wan, Y; Li, Y; Guo, Y; Ganzhu, Z; and Qin, X                                   | Canadian Journal of Remote Sensing                                               | 2011 |
| Durante, M; Oesterheld, M; Pineiro, G; Vassallo, MM                                             | International Journal of Remote Sensing                                          | 2014 |
| Dusseux, P; Hubert-Moy, L; Corpetti, T; Vertès, F                                               | International Journal of Applied Earth Observation and Geoinformation            | 2015 |
| Egeru, A; Wasonga, O; Kyagulanyi, J; Majaliwa, GJ; MacOpiyo, L; Mburu, J                        | Pastoralism                                                                      | 2014 |
| Fajji, NG; Palamuleni, LG; Mlambo, V                                                            | South African Journal of Geomatics                                               | 2017 |
| Fatehi, P; Damm, A; Schweiger, AK; Schaepman, ME; Kneubühler, M                                 | IEEE Journal of Selected Topics in Applied Earth Observations and Remote Sensing | 2015 |
| Flynn, ES; Dougherty, CT; Wendroth, O                                                           | Agronomy Journal                                                                 | 2008 |
| Friedl, MA; Schimel, DS; Michaelsen, J; Davis, FW; Walker, H                                    | International Journal of Remote Sensing                                          | 1994 |
| Frolking, S; Fahnestock, M; Milliman, T; McDonald, K; Kimball, J                                | Geophysical Research Letters                                                     | 2005 |

|                                                                                                    |                                                                                     |      |
|----------------------------------------------------------------------------------------------------|-------------------------------------------------------------------------------------|------|
| Gao, JX; Chen, YM; Lü, SH; Feng, CY;<br>Chang, XL; Ye, SX; Liu, JD                                 | International Journal of Remote Sensing                                             | 2012 |
| Gao, T; Xu, B; Yang, X; Jin, Y; Ma, H; Li, J;<br>Yu, H                                             | International Journal of Remote Sensing                                             | 2012 |
| Gao, X; Dong, S; Li, S; Xu, Y; Liu, S; Zhao,<br>H; Yeomans, J; Li, Y; Shen, H; Wu, S; Zhi, Y       | Ecological Indicators                                                               | 2020 |
| Gianelle, D; Vescovo, L; Mason, F                                                                  | International Journal of Wildland Fire                                              | 2009 |
| Gianelle, DAMIANO; Guastella, FB;                                                                  | International Journal of Remote Sensing                                             | 2010 |
| Gruner, E; Astor, T; Wachendorf, M                                                                 | Agronomy-Basel                                                                      | 2019 |
| Guerini Filho, M; Kuplich, TM; Quadros,<br>FLD                                                     | International Journal of Remote Sensing                                             | 2020 |
| Hajj, ME; Baghdadi, N; Belaud, G; Zribi,<br>M; Cheviron, B; Courault, D; Hagolle, O;<br>Charron, F | Remote Sensing                                                                      | 2014 |
| He, L; Li, A; Yin, G; Nan, X; Bian, J                                                              | Remote Sensing                                                                      | 2019 |
| Ikeda, H; Okamoto, K; Fukuhara, M;                                                                 | International Journal of Remote Sensing                                             | 1999 |
| Jansen, VS; Kolden, CA; Schmalz HJ                                                                 | Remote Sensing                                                                      | 2018 |
| Jia, W; Liu, M; Yang, Y; He, H; Zhu, X;<br>Yang, F; Yin, C; Xiang, W                               | Ecological Indicators                                                               | 2016 |
| Jiang, YB; Tao, J; Huang, YQ; Zhu, JT; Tian,<br>L; Zhang, YJ                                       | Journal of Plant Ecology                                                            | 2015 |
| Jin, Y; Yang, X; Qiu, J; Li, J; Gao, T; Wu, Q;<br>Zhao, F; Ma, H; Yu, H; Xu, B                     | Remote Sensing                                                                      | 2014 |
| Justice BO; Hiernaux PHY                                                                           | International Journal of Remote Sensing                                             | 1986 |
| Kawamura, K; Betteridge, K; Sanches, ID;<br>Tuohy, MP; Costall, D; Inoue, Y                        | New Zealand Journal of Agricultural Research                                        | 2009 |
| Li, C; Wulf, H; Schmid, B; He, JS;<br>Schaeppman, ME                                               | IEEE Journal of Selected Topics in Applied Earth Observations And<br>Remote Sensing | 2018 |
| Li, F; Zeng, Y; Luo, J; Ma, R; Wu, B                                                               | Ecological Indicators                                                               | 2016 |
| Li, Z; Guo, X                                                                                      | Canadian Journal of Remote Sensing                                                  | 2017 |
| Li, ZQ; Guo, XL                                                                                    | International Journal of Remote Sensing                                             | 2018 |
| Liang, T; Yang, S; Feng, Q; Liu, B; Zhang,<br>R; Huang, X; Xie, H                                  | Remote Sensing of Environment                                                       | 2016 |
| Liu, S; Su, X; Dong, S; Cheng, F; Zhao, H;<br>Wu, X; Li, J.                                        | Giscience & Remote Sensing                                                          | 2015 |
| Lussem, U; Schellberg, J; Bareth, G                                                                | PFG-Journal of Photogrammetry, Remote Sensing and<br>Geoinformation Science         | 2007 |
| Marabel, M; Alvarez-Taboada, F                                                                     | Sensors                                                                             | 2008 |
| Meng, B; Ge, J; Liang, T; Yang, S; Gao, J;<br>Feng, Q; Cui, X; Huang, X; Xie, H                    | Remote Sensing                                                                      | 2015 |
| Meng, B; Liang, T; Yi, S; Yin, J; Cui, X; Ge,<br>J; Hou, M; Lv, Y; Sun, Y                          | IEEE Journal of Selected Topics in Applied Earth Observations and<br>Remote Sensing | 2020 |
| Meshesha, DT; Ahmed, MM; Abdi, DY;<br>Haregeweyn, N                                                | Heliyon                                                                             | 2020 |
| Moeckel, T; Safari, H; Reddersen, B; Fricke,<br>T; Wachendorf, M                                   | Remote Sensing                                                                      | 2017 |
| Moreau, S; Le Toan, T                                                                              | Remote Sensing of Environment                                                       | 2003 |
| Mutanga, O; Rugege, D                                                                              | International Journal of Remote Sensing                                             | 2006 |
| Mutanga, O; Skidmore, AK                                                                           | International Journal of Applied Earth Observation And<br>Geoinformation            | 2004 |

|                                                                                                |                                                                         |      |
|------------------------------------------------------------------------------------------------|-------------------------------------------------------------------------|------|
| Mutanga, O; Skidmore, AK                                                                       | International Journal of Remote Sensing                                 | 2004 |
| Naidoo, L; Van Deventer, H; Ramoelo, A; Mathieu, R; Nondlazi, B, Gangat, R                     | International Journal of Applied Earth Observation and Geoinformation   | 2019 |
| Olsen, JL; Miehe, S; Ceccato, P; Fensholt, R                                                   | Biogeosciences                                                          | 2015 |
| Otgonbayar, M; Atzberger, C; Chambers, J; Damdinsuren, A                                       | International Journal of Remote Sensing                                 | 2019 |
| Prince SD; Tucker, CJ                                                                          | International Journal of Remote Sensing                                 | 1986 |
| Psomas, A; Kneubühler, M; Huber, S; Itten, K; Zimmermann, NE                                   | International Journal of Remote Sensing                                 | 2011 |
| Punalekar, SM; Verhoef, A; Quaife, TL; Humphries, D; Bermingham, L; Reynolds, CK               | Remote Sensing of Environment                                           | 2018 |
| Quan, X; He, B; Yebra, M; Yin, C; Liao, Z; Zhang, X; Li, X                                     | International Journal of Applied Earth Observation and Geoinformation   | 2017 |
| Ramoelo, A; Cho, MA; Mathieu, R; Madonsela, S; Van De Kerchove, R; Kaszta, Z; Wolff, E         | International Journal of Applied Earth Observation and Geoinformation   | 2015 |
| Ren, H; Feng, G;                                                                               | Grass and Forage Science                                                | 2015 |
| Sang, H; Zhang, J; Lin, H; Zhai, L                                                             | Remote Sensing                                                          | 2014 |
| Sarrazin, MJD; Van Aardt, JAN; Asner, GP; Mcglinchy, J; Messinger, DW; Wu, J                   | Canadian Journal of Remote Sensing                                      | 2011 |
| Schino, G; Borfecchia, F; De Cecco, L; Dibari, C; Iannetta, M; Martini, S; Pedrotti, F         | Agroforestry Systems                                                    | 2008 |
| Schmidt, M; Carter, J; Stone, G; O'Reagain, P                                                  | Remote Sensing                                                          | 2016 |
| Schulze-Brüninghoff, D; Hensgen, F; Wachendorf, M; Astor, T                                    | Computers and Electronics in Agriculture                                | 2019 |
| Schweiger, AK; Risch, AC; Damm, A; Kneubuhler, M; Haller, R; Schaepman, ME; Schutz, M          | Journal of Vegetation Science                                           | 2015 |
| Schwieder, M; Buddeberg, M; Kowalski, K; Pfoch, K; Bartsch, J; Bach, H; Pickert, J; Hostert, P | PFG-Journal of Photogrammetry Remote Sensing and Geoinformation Science | 2020 |
| Shen, M; Tang, Y; Klein, J; Zhang, P; Gu, S; Shimono, A; Chen, J                               | Journal of Plant Ecology                                                | 2008 |
| Shoko, C; Mutanga, O; Dube, T                                                                  | Remote Sensing                                                          | 2013 |
| Shoko, O Mutanga, T Dube                                                                       | International Journal of Applied Earth Observation and Geoinformation   | 2018 |
| Sibanda, M; Mutanga, O; Rouget, M                                                              | Giscience & Remote Sensing                                              | 2016 |
| Sibanda, M; Mutanga, O; Rouget, M                                                              | ISPRS Journal of Photogrammetry and Remote Sensing                      | 2015 |
| Sibanda, M; Mutanga, O; Rouget, M; Kumar, L                                                    | Remote Sensing                                                          | 2017 |
| Svoray, T; Shoshany, M                                                                         | International Journal of Remote Sensing                                 | 2002 |
| Ullah, S; Si, Y; Schlerf, M; Skidmore, A.K; Shafique, M; Iqbal, IA                             | International Journal of Applied Earth Observation and Geoinformation   | 2012 |
| Vanamburg, LK; Trlica, MJ; Hoffer, RM; Weltz, MA                                               | International Journal of Remote Sensing                                 | 2006 |
| Verbesselt, J; Somers, B; van Aardt, J.A.N; Jonckheere, I; Coppin, P                           | Remote Sensing of Environment                                           | 2006 |

|                                                                                       |                                                                          |      |
|---------------------------------------------------------------------------------------|--------------------------------------------------------------------------|------|
| Vescovo, L; Gianelle, D                                                               | Advances in Space Research                                               | 2008 |
| Vogel, S; Gebbers, R; Oertel, M; Kramer, E                                            | Sensors                                                                  | 2019 |
| Wang, CY; Price, KP; Merwe, D; An, N;<br>Wang, H                                      | Photogrammetric Engineering & Remote Sensing                             | 2014 |
| Wang, D; Xin, X; Shao, Q; Brolly, M; Zhu,<br>Z; Chen, J                               | Sensors                                                                  | 2017 |
| Wang, G; Liu, S; Liu, T; Fu, Z; Yu, J; Xue, B                                         | International Journal of Remote Sensing                                  | 2019 |
| Wang, J; Xiao, X; Bajgain, R; Starks, P;<br>Steiner, J; Doughty, RB; Chang, Q         | ISPRS Journal of Photogrammetry And Remote Sensing                       | 2019 |
| Wang, X; Dong, J; Baoyin, T; Bao, Y                                                   | Sustainability                                                           | 2019 |
| Wang, X; Ge, L; Li, X; Gherardi, S                                                    | Photogrammetric Engineering & Remote Sensing                             | 2014 |
| Wang, Y; Wu, G; Deng, L; Tang, Z; Wang,<br>K; Sun, W; Shangguan, Z                    | Scientific Reports                                                       | 2017 |
| Wehlage, DC; Gamon, JA; Thayer, D;<br>Hildebrand, DV                                  | Remote Sensing                                                           | 2016 |
| Wessels, KJ; Prince, SD; Zambatis, N;<br>MacFadyen, S; Frost, PE; Van Zyl, D          | International Journal of Remote Sensing                                  | 2006 |
| Wijesingha, J; Moeckel, T; Hensgen, F;<br>Wachendorf, M                               | International Journal of Applied Earth Observation and<br>Geoinformation | 2019 |
| Wylie, BK; Meyer, DJ; Tieszen, LL; Mannel,<br>S                                       | Remote Sensing of Environment                                            | 2009 |
| Xie, Y; Sha, Z; Yu, M; Bai, Y; Zhang, L                                               | Ecological Modelling                                                     | 2009 |
| Xing, M; He, B; Li, X                                                                 | Journal of Applied Remote Sensing                                        | 2014 |
| Yan, F; Wu, B; Wang, Y.                                                               | Journal Of Arid Land                                                     | 2013 |
| Yang, S; Feng, Q; Liang, T; Liu, B; Zhang,<br>W; Xie, H                               | Remote Sensing of Environment                                            | 2018 |
| Yin, G; Li, A; Wu, C; Wang, J; Xie, Q;<br>Zhang, Z; Nan, X; Jin, H; Bian, J; Lei, G   | ISPRS International Journal of Geo-Information                           | 2018 |
| Yin, X; Wang, C; Zong, Z; Wang, H;<br>Zhang, ; Zhang, W                               | Spectroscopy Letters                                                     | 2018 |
| Zeng, N; He, H; Ren, X; Zhang, L; Zeng, Y;<br>Fan, J; Li, Y; Niu, Z; Zhu, X; Chang, Q | International Journal of Remote Sensing                                  | 2020 |
| Zeng, N; Ren, X; He, H; Zhang, L; Li, P; Li,<br>Z; Zhang, L                           | Research of Environmental Sciences                                       | 2017 |
| Zeng, N; Ren, X; He, H; Zhang, L; Zhao, D;<br>Ge, R; Niu, Z                           | Ecological Indicators                                                    | 2019 |
| Zhang, B; Zhang, L; Xie, D; Yin, X; Liu, C;<br>Liu, G                                 | Remote Sensing                                                           | 2016 |
| Zhang, H; Sun, Y; Chang, L; Qin, Y; Chen,<br>J; Qin, Y; Du J; Yi, S, Wang, Y          | Remote Sensing                                                           | 2018 |
| Zhang, X; Chen, X; Tian, M; Fan, Y; Ma, J;<br>Xing, D                                 | Plos One                                                                 | 2020 |
| Zhao, F; Xu, B; Yang, X; Jin, Y; Li, J; Xia, L;<br>Chen, S; Ma, H                     | Remote Sensing                                                           | 2014 |
